# Supplementary material for: The Current Status of Drug Discovery and Development as Originated in United States Academia: The Influence of Industrial and Academic Collaboration on Drug Discovery and Development
Source: PubMed Central journal article supplement — Clin Transl Sci. 2018 Jul 30;11(6):597–606. doi: 10.1111/cts.12577 (PMC6226120; doi:10.1111/cts.12577), 2018-07-30
Supplement: CTS-11-597-s001.pdf [file CTS-11-597-s001.pdf]

**Table S1. 36 US universities extracted from The 2014-2015 Times Higher Education World University Rankings (Clinical, Pre-Clinical and Health).**

| <b>The 2014-2015 Times Higher Education World University Rankings (Clinical, Pre-Clinical and Health)</b> | <b>Name</b>                                 | <b>Location</b>                              | <b>Times Higher Education Point (Clinical, Pre-Clinical and Health)</b> |
|-----------------------------------------------------------------------------------------------------------|---------------------------------------------|----------------------------------------------|-------------------------------------------------------------------------|
| 2                                                                                                         | Harvard University                          | Cambridge, MA, United States of America      | 92                                                                      |
| 5                                                                                                         | Stanford University                         | Stanford, CA, United States of America       | 85.7                                                                    |
| 6                                                                                                         | Columbia University                         | New York, NY, United States of America       | 85.1                                                                    |
| 7                                                                                                         | Johns Hopkins University                    | Baltimore, MD, United States of America      | 84.8                                                                    |
| 9                                                                                                         | University of California, Los Angeles       | Los Angeles, CA, United States of America    | 84                                                                      |
| 10                                                                                                        | Yale University                             | New Haven, CT, United States of America      | 83.6                                                                    |
| 12                                                                                                        | University of Washington                    | Seattle, WA, United States of America        | 82.1                                                                    |
| 16                                                                                                        | Washington University in St Louis           | St Louis, MO, United States of America       | 80.5                                                                    |
| 17                                                                                                        | Duke University                             | Durham, NC, United States of America         | 80                                                                      |
| 18.1                                                                                                      | University of Michigan                      | Ann Arbor, MI, United States of America      | 79.7                                                                    |
| 18.2                                                                                                      | University of Pennsylvania                  | Philadelphia, PA, United States of America   | 79.7                                                                    |
| 21                                                                                                        | University of North Carolina at Chapel Hill | Chapel Hill, NC, United States of America    | 78.3                                                                    |
| 22                                                                                                        | University of Pittsburgh                    | Pittsburgh, PA, United States of America     | 75.6                                                                    |
| 24                                                                                                        | University of California, Berkeley          | Berkeley, CA, United States of America       | 75                                                                      |
| 25                                                                                                        | Boston University                           | Boston, MA, United States of America         | 74.9                                                                    |
| 28                                                                                                        | University of Chicago                       | Chicago, IL, United States of America        | 71.9                                                                    |
| 30                                                                                                        | Cornell University                          | Ithaca, NY, United States of America         | 71.4                                                                    |
| 31                                                                                                        | Emory University                            | Atlanta, GA, United States of America        | 70.8                                                                    |
| 33                                                                                                        | University of California, San Diego         | La Jolla, CA, United States of America       | 69.9                                                                    |
| 34                                                                                                        | Northwestern University                     | Evanston, IL, United States of America       | 68.8                                                                    |
| 40                                                                                                        | Vanderbilt University                       | Nashville, TN, United States of America      | 66.9                                                                    |
| 41                                                                                                        | New York University                         | New York, NY, United States of America       | 66                                                                      |
| 43                                                                                                        | University of Minnesota                     | Minneapolis, MN, United States of America    | 65.5                                                                    |
| 51                                                                                                        | Tufts University                            | Medford, MA, United States of America        | 63.2                                                                    |
| 55                                                                                                        | University of Massachusetts                 | Shrewsbury, MA, United States of America     | 61.2                                                                    |
| 60                                                                                                        | University of Southern California           | Los Angeles, CA, United States of America    | 58.8                                                                    |
| 63                                                                                                        | University of Iowa                          | Iowa City, IA, United States of America      | 58.5                                                                    |
| 64                                                                                                        | University of Wisconsin-Madison             | Madison, WI, United States of America        | 58.4                                                                    |
| 66                                                                                                        | University of Miami                         | Coral Gables, FL, United States of America   | 57.4                                                                    |
| 69                                                                                                        | Case Western Reserve University             | Cleveland, OH, United States of America      | 56.6                                                                    |
| 72                                                                                                        | Ohio State University                       | Columbus, OH, United States of America       | 55.8                                                                    |
| 73                                                                                                        | University of Florida                       | Gainesville, FL, United States of America    | 55.7                                                                    |
| 78                                                                                                        | University of California, Davis             | Davis, CA, United States of America          | 53.9                                                                    |
| 80                                                                                                        | University of Cincinnati                    | Cincinnati, OH, United States of America     | 53.1                                                                    |
| 84                                                                                                        | University of Rochester                     | Rochester, NY, United States of America      | 52.5                                                                    |
| 93                                                                                                        | University of Utah                          | Salt Lake City, UT, United States of America | 51.4                                                                    |
