# Supplementary material for: The Current Status of Drug Discovery and Development as Originated in United States Academia: The Influence of Industrial and Academic Collaboration on Drug Discovery and Development
Source: PubMed Central journal article supplement — Clin Transl Sci. 2018 Jul 30;11(6):597–606. doi: 10.1111/cts.12577 (PMC6226120; doi:10.1111/cts.12577), 2018-07-30
Supplement: CTS-11-597-s002.pdf [file CTS-11-597-s002.pdf]

**Table S2. 14 drugs approved from the 798 projects begun between 1991 and 2010.**

| Drug Name      | Active Ingredients               | Indication                                                                  | Originator                            | Company                                                         | Approval Year of FDA                                                          | Review Priority;<br>Orphan Status |
|----------------|----------------------------------|-----------------------------------------------------------------------------|---------------------------------------|-----------------------------------------------------------------|-------------------------------------------------------------------------------|-----------------------------------|
| Alex           | loteprednol etabonate            | Seasonal allergic conjunctivitis                                            | University of Florida                 | ausch & Lomb Pharmaceuticals, Inc.                              | 1998                                                                          | Standard                          |
| Emtriva        | emtricitabine                    | HIV infection                                                               | Emory University                      | Gilead Sciences, Inc.                                           | 2003                                                                          | Standard                          |
| Myozyme        | alglucosidase alfa               | Pompe disease                                                               | Duke University                       | Genzyme Corporation                                             | 2006                                                                          | N/A; Orphan                       |
| Relistor       | methylnaltrexone bromide         | Treatment of opioid-induced constipation                                    | University of Chicago                 | Progenics Pharmaceuticals, Inc.                                 | 2008                                                                          | Standard                          |
| Krystexxa      | pegloticase                      | Chronic gout                                                                | Duke University                       | Savient Pharmaceuticals, Inc.                                   | 2010                                                                          | N/A; Orphan                       |
| Kyprolis       | carfilzomib                      | Multiple myeloma                                                            | Yale University                       | Onyx Pharmaceuticals, Inc                                       | 2012                                                                          | Standard; Orphan                  |
| Amyvid         | florbetapir (18F)                | Positron Emission Tomography imaging for Alzheimer's disease                | University of Pennsylvania            | Eli Lilly and Company                                           | 2012                                                                          | PRIORITY                          |
| Vizamyl        | flutemetamol (18F)               | Positron Emission Tomography imaging for Alzheimer's disease                | University of Pittsburgh              | Cardinal Health for GE Health care                              | 2013                                                                          | Standard                          |
| Lymphoseek     | technetium Tc 99m<br>tilmanocept | Radioactive diagnostic agent for breast cancer or melanoma                  | University of California San<br>Diego | Navidea Biopharmaceuticals                                      | 2013                                                                          | Standard                          |
| Cerdelga       | eliglustat tartrate              | Gaucher disease type 1                                                      | University of Michigan                | Genzyme Ireland, Ltd.                                           | 2014                                                                          | Priority; Orphan                  |
| Neuraceq       | florbetaben (18F)                | Positron Emission Tomography imaging for Alzheimer's disease                | University of Pennsylvania            | Piramal Imaging                                                 | 2014                                                                          | Standard                          |
| Strensiq       | susoctocog alfa                  | Perinatal/infantile- and juvenile-onset hypophosphatasia (HPP)              | Emory University                      | Alexion Pharmaceuticals, Inc.                                   | 2015                                                                          | N/A; Orphan                       |
| Carmeseal-MD   | Carmeseal                        | Duchenne muscular dystrophy                                                 | University of Michigan                | Phrixus Pharmaceuticals, Inc.<br>EthicorPharma Ltd.             | Not approved by the FDA<br>Available in European Access<br>Program since 2015 | N/A                               |
| Fulstan/Hornel | falecalcitriol                   | Hypoparathyroidism, Osteomalacia, Rickets, Secondary<br>hyperparathyroidism | University of Wisconsin-Madison       | Kissei Pharmaceutical Co Ltd or<br>Taisho Pharmaceutical Co Ltd | Not approved by the FDA<br>Approved in Japan in 2001                          | N/A                               |
